# Supplementary material for: Fluorination Effects on NOS Inhibitory Activity of Pyrazoles Related to Curcumin
Source: PubMed Central journal article supplement (PMC6332466; doi:10.3390/molecules200915643), 2015-08-28
Supplement: molecules-20-15643-s001.pdf [file molecules-20-15643-s001.pdf]

# Supplementary Material

## NMR Parameters

Solution NMR spectra were recorded on a Bruker DRX 400 (9.4 Tesla, 400.13 MHz for  $^1\text{H}$ , 100.62 MHz for  $^{13}\text{C}$ , 40.54 MHz for  $^{15}\text{N}$  and 376.50 MHz for  $^{19}\text{F}$ ) spectrometer with a 5-mm inverse-detection H-X probe equipped with a z-gradient coil ( $^1\text{H}$ ,  $^{13}\text{C}$ ,  $^{15}\text{N}$ ) and with a QNP 5 mm probe ( $^{19}\text{F}$ ), at 295 K. Chemical shifts ( $\delta$  in ppm) are given from internal solvent, DMSO- $d_6$  2.49 for  $^1\text{H}$  and 39.5 for  $^{13}\text{C}$ ,  $\text{CDCl}_3$  7.26 for  $^1\text{H}$  and 77.0 for  $^{13}\text{C}$ , HMPA- $d_{18}$  2.51 to the upfield multiplet for  $^1\text{H}$  and 35.8 for  $^{13}\text{C}$ . External references were used for  $^{15}\text{N}$  and  $^{19}\text{F}$ , nitromethane and  $\text{CFCl}_3$ , respectively. Coupling constants ( $J$  in Hz) are accurate to  $\pm 0.2$  Hz for  $^1\text{H}$ ,  $\pm 0.8$  Hz for  $^{19}\text{F}$  and  $\pm 0.6$  Hz for  $^{13}\text{C}$ . Typical parameters for  $^1\text{H}$ -NMR spectra were spectral width 6500 Hz and pulse width 7.5  $\mu\text{s}$  at an attenuation level of 0 dB. Typical parameters for  $^{19}\text{F}$ -NMR spectra were spectral width 55 kHz, pulse width 13.75  $\mu\text{s}$  at an attenuation level of -6 dB and relaxation delay 1 s. Typical parameters for  $^{13}\text{C}$ -NMR spectra were spectral width 21 kHz, pulse width 10.6  $\mu\text{s}$  at an attenuation level of -6 dB and relaxation delay 2 s; WALTZ-16 was used for broadband proton decoupling; the FIDs were multiplied by an exponential weighting ( $\text{lb} = 2$  Hz) before Fourier transformation. 2D ( $^1\text{H}$ - $^{13}\text{C}$ ) gs-HMQC and ( $^1\text{H}$ - $^{13}\text{C}$ ) gs-HMBC were acquired and processed using standard Bruker NMR software and in non-phase-sensitive mode [77]. Gradient selection was achieved through a 5% sine truncated shaped pulse gradient of 1 ms. Selected parameters for ( $^1\text{H}$ - $^{13}\text{C}$ ) gs-HMQC and gs-HMBC spectra were spectral width 3500 Hz for  $^1\text{H}$  and 20.5 kHz for  $^{13}\text{C}$ ,  $1024 \times 256$  data set, number of scans 2 (gs-HMQC) or 4 (gs-HMBC) and relaxation delay 1 s. The FIDs were processed using zero filling in the  $F_1$  domain and a sine-bell window function in both dimensions was applied prior to Fourier transformation. In the gs-HMQC experiments, GARP modulation of  $^{13}\text{C}$  was used for decoupling. Selected parameters for ( $^1\text{H}$ - $^{15}\text{N}$ ) gs-HMQC spectra were spectral width 6500 Hz for  $^1\text{H}$  and 12.5 kHz for  $^{15}\text{N}$ ,  $1024 \times 256$  data set, number of scans 4, relaxation delay 1 s. The FIDs were processed using zero filling in the  $F_1$  domain and a sine-bell window function in both dimensions was applied prior to Fourier transformation. Variable-temperature experiments (DNMR) were recorded with the same spectrometer and a Bruker BVT3000 temperature unit was used to control the temperature of the cooling gas stream and an exchanger to achieve low temperatures.

Solid-state NMR  $^{13}\text{C}$  (100.73 MHz) and  $^{15}\text{N}$  (40.60 MHz) CPMAS spectra have been obtained on a Bruker WB 400 spectrometer at 300 K using a 4 mm DVT probehead. Samples were carefully packed in a 4 mm diameter cylindrical zirconia rotor with Kel-F end-caps. Operating conditions involved 3.2  $\mu\text{s}$   $90^\circ$   $^1\text{H}$  pulses and decoupling field strength of 86.2 kHz by TPPM sequence.  $^{13}\text{C}$  spectra were originally referenced to a glycine sample and then the chemical shifts were recalculated to the  $\text{Me}_4\text{Si}$  (for the carbonyl atom  $\delta$  (glycine) = 176.1 ppm) and  $^{15}\text{N}$  spectra to  $^{15}\text{NH}_4\text{Cl}$  and then converted to nitromethane scale using the relationship:  $\delta^{15}\text{N}$  (nitromethane) =  $\delta^{15}\text{N}$  (ammonium chloride) - 338.1 ppm. Typical acquisition parameters for  $^{13}\text{C}$  CPMAS were: spectral width, 40 kHz; recycle delay, 30–100 s; acquisition time, 30 ms; contact time, 5 ms; and spin rate, 12 kHz. In order to distinguish protonated and unprotonated carbon atoms, the NQS (Non-Quaternary Suppression) experiment by conventional cross-polarization was recorded; before the acquisition the decoupler is switched off for a very short time of 25  $\mu\text{s}$  [78–80]. And for  $^{15}\text{N}$  CPMAS were: spectral width, 40 kHz; recycle delay, 30–100 s; acquisition time, 35 ms; contact time, 6 ms; and spin rate, 6 kHz.

Solid-state  $^{19}\text{F}$  (376.94 MHz) NMR spectra have been obtained on a Bruker WB 400 spectrometer using a MAS DVT BL2.5 X/F/H double resonance probehead. Samples were carefully packed in 2.5 mm

diameter cylindrical zirconia rotors with Kel-F end-caps. Samples were spun at the magic angle at rates of 25 kHz and the experiments were carried out at ambient probe temperature. Typical parameters for single pulse  $^{19}\text{F}$  MAS NMR spectra were: spectral width, 75 KHz; pulse width, 2.5  $\mu\text{s}$ ; recycle delay, 10 s; scans, 128; and spin rate, 25 kHz. The typical acquisition parameters  $^{19}\text{F}\{^1\text{H}\}$  MAS were: spectral width, 75 kHz; recycle delay, 10 s; pulse width, 2.5  $\mu\text{s}$  and proton decoupling field strength of 100 kHz by SPINAL-64 sequence; recycle delay, 10 s; acquisition time, 25 ms; 128 scans; and spin rate, 25 kHz. The  $^{19}\text{F}$  spectra were referenced to ammonium trifluoroacetate sample and then the chemical shifts were recalculated to the  $\text{CFCl}_3$  ( $\delta \text{CF}_3\text{COO}^-\text{NH}_4^+ = -72.0$  ppm).

**Table S1.**  $^1\text{H}$ -NMR in solution of pyrazole derivatives (chemical shifts  $\delta$  in ppm,  $J$  coupling constants in Hz).

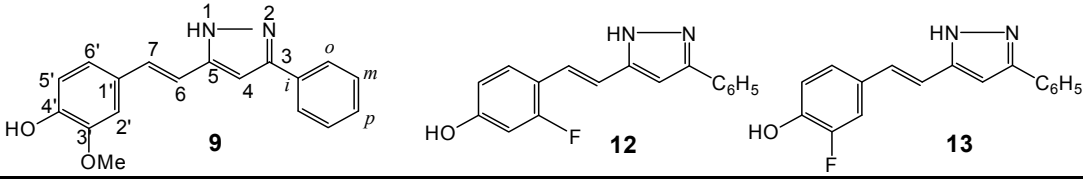

| Nuclei         | 9 [5,6]                                                      |                                                              | 12                            |                                | 13                                                          |                                |
|----------------|--------------------------------------------------------------|--------------------------------------------------------------|-------------------------------|--------------------------------|-------------------------------------------------------------|--------------------------------|
| Solvent (Temp) | DMSO- $d_6$ 300K                                             | DMSO- $d_6$ 295K                                             | DMSO- $d_6$ 300K              | DMSO- $d_6$ 290K               | DMSO- $d_6$ 360K                                            | HMPA- $d_{18}$ 295K            |
| NH             | 13.18 (36%)<br>12.96 (64%)                                   | 13.23 (33%)<br>13.06 (67%)                                   | 13.25 (43%)<br>13.06 (57%)    | 13.25 (40%)<br>13.05 (60%)     | 12.75                                                       | 14.03 (33%)<br>13.80 (67%)     |
| H4             | 6.88                                                         | 6.91                                                         | 6.85                          | 6.85 (major)<br>6.90–7.24      | 6.80                                                        | 6.97 (major)<br>7.08–7.19      |
| H6             | 6.95<br>$^3J_{\text{H}7} = 16.5$                             | 6.99<br>$^3J_{\text{H}7} = 16.9$                             | 7.89–6.85                     | 6.90–7.24                      | 6.93<br>$^3J_{\text{H}7} = 16.6$                            | 7.08–7.19                      |
| H7             | 7.10<br>$^3J_{\text{H}6} = 16.5$                             | 7.17<br>$^3J_{\text{H}6} = 16.9$                             | 7.89–6.85                     | 6.90–7.24                      | 7.08<br>$^3J_{\text{H}6} = 16.6$                            | 7.02–7.04                      |
| H2'            | 7.15                                                         | ---                                                          | 7.89–6.85                     | 7.24–7.51                      | 7.30<br>$^3J_{\text{F}} = 12.6$<br>$^4J_{\text{H}6'} = 2.1$ | 7.22–7.25                      |
| H3'            | 3.84<br>(OMe)                                                | 6.60<br>$^3J_{\text{F}} = 12.8$<br>$^4J_{\text{H}5'} = 2.4$  | ---                           | ---                            | ---                                                         | ---                            |
| OH             | 9.21 (major)<br>9.10 (minor)                                 | 10.12                                                        | 10.13 (major)<br>9.03 (minor) | 10.12 (major)<br>10.03 (minor) | 9.53                                                        | 11.15 (major)<br>11.04 (minor) |
| H5'            | 6.78<br>$^3J_{\text{H}6'} = 8.1$                             | 6.65<br>$^3J_{\text{H}6'} = 8.5$<br>$^4J_{\text{H}3'} = 2.4$ | 7.89–6.85                     | 6.90–7.24                      | 6.96<br>$^3J_{\text{H}6} = 8.3$<br>$^4J_{\text{F}} = 9.2$   | 7.02–7.04                      |
| H6'            | 6.96<br>$^3J_{\text{H}5'} = 8.1$<br>$^4J_{\text{H}2'} = 1.8$ | 7.53                                                         | 7.89–6.85                     | 6.90–7.24                      | 7.16<br>$^3J_{\text{H}5} = 8.2$<br>$^4J_{\text{H}2'} = 2.2$ | 7.08–7.19                      |
| Ho             | 7.80                                                         | 7.80                                                         | 7.79                          | 7.80 (major)<br>7.76 (minor)   | 7.78                                                        | 8.02 (minor)<br>7.86 (major)   |
| Hm             | 7.43                                                         | 7.41                                                         | 7.89–6.85                     | 7.24–7.51                      | 7.41                                                        | 7.36                           |
| Hp             | 7.31<br>$^3J_{\text{H}m} = ^3J_{\text{H}m} = 6.7$            | 7.30                                                         | 7.89–6.85                     | 7.24–7.51                      | 7.30                                                        | 7.22–7.25                      |

Table S1. Cont.

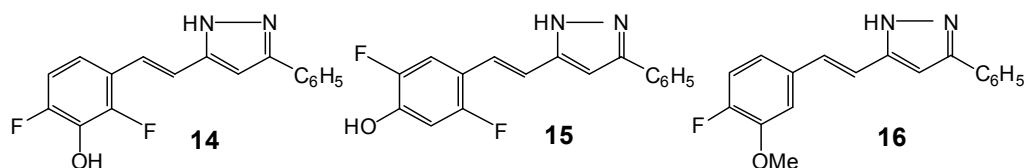

| Nuclei         | 14                               | 15                                                                                      | 16                                                                                                                      |                                  |                                                                                                                       |                                   |
|----------------|----------------------------------|-----------------------------------------------------------------------------------------|-------------------------------------------------------------------------------------------------------------------------|----------------------------------|-----------------------------------------------------------------------------------------------------------------------|-----------------------------------|
| Solvent (Temp) | DMSO- <i>d</i> <sub>6</sub> 295K | DMSO- <i>d</i> <sub>6</sub> 295K                                                        | CDCl <sub>3</sub> 300K                                                                                                  | DMSO- <i>d</i> <sub>6</sub> 295K | DMSO- <i>d</i> <sub>6</sub> 360K                                                                                      | HMPA- <i>d</i> <sub>18</sub> 295K |
| NH             | 13.33 (46%)<br>13.17 (54%)       | 13.28 (40%)<br>13.12 (60%)                                                              | n. o.                                                                                                                   | 13.29 (43%)<br>13.10 (57%)       | 12.84                                                                                                                 | 14.06 (35%)<br>13.94 (65%)        |
| H4             | 6.98–7.23                        | 6.99 (minor)<br>6.91 (major)                                                            | 6.75                                                                                                                    | 7.0 (minor)<br>6.90 (major)      | 6.84                                                                                                                  | 6.92 (major)<br>7.62–6.98 (minor) |
| H6             | 6.98–7.23                        | 7.06<br><sup>3</sup> J <sub>H7</sub> = 16.6                                             | 6.97<br><sup>3</sup> J <sub>H7</sub> = 16.6                                                                             | 7.26–7.06                        | 7.07<br><sup>3</sup> J <sub>H7</sub> = 16.3                                                                           | 7.62–6.98                         |
| H7             | 6.98–7.23                        | 7.15<br><sup>3</sup> J <sub>H6</sub> = 16.6                                             | 7.05<br><sup>3</sup> J <sub>H6</sub> = 16.6                                                                             | 7.26–7.06                        | 7.16<br><sup>3</sup> J <sub>H6</sub> = 16.3                                                                           | 7.62–6.98                         |
| H2'            | ---                              | ---                                                                                     | 7.09<br><sup>4</sup> J <sub>F</sub> = 8.2<br><sup>4</sup> J <sub>H6'</sub> = 2.0                                        | 7.50–7.20                        | 7.32<br><sup>4</sup> J <sub>F</sub> ~ 8.1<br><sup>4</sup> J <sub>H6'</sub> = 2                                        | 7.62–6.98                         |
| H3'            | ---                              | 6.78 (dd)<br><sup>4</sup> J <sub>F5'</sub> = 7.4<br><sup>3</sup> J <sub>F2</sub> = 11.6 | 3.93<br>(OMe)                                                                                                           | 3.90<br>(OMe)                    | 3.92<br>(OMe)                                                                                                         | 3.95<br>(OMe)                     |
| OH             | 10.30                            | 10.6 (s, br)                                                                            | ---                                                                                                                     | ---                              | ---                                                                                                                   | ---                               |
| H5'            | 6.98–7.23                        | ---                                                                                     | 7.05<br><sup>3</sup> J <sub>H6'</sub> = 8.3<br><sup>3</sup> J <sub>F</sub> = 10.9                                       | 7.26–7.06                        | 7.15<br><sup>3</sup> J <sub>H6'</sub> = 8.5<br><sup>3</sup> J <sub>F</sub> = 11.5                                     | 7.62–6.98                         |
| H6'            | 6.98–7.23                        | 7.58 (m)                                                                                | 6.99<br><sup>3</sup> J <sub>H5'</sub> = 8.3<br><sup>4</sup> J <sub>F</sub> = 4.7<br><sup>4</sup> J <sub>H2'</sub> = 2.0 | 7.26–7.06                        | 7.10<br><sup>4</sup> J <sub>F</sub> = 4.7<br><sup>3</sup> J <sub>H5'</sub> = 8.5<br><sup>4</sup> J <sub>H2'</sub> = 2 | 7.62–6.98                         |
| Ho             | 7.80                             | 7.80 (m)                                                                                | 7.71                                                                                                                    | 7.80 (major)<br>7.77 (minor)     | 7.78                                                                                                                  | 8.00 (minor)<br>7.84 (major)      |
| Hm             | 7.42                             | 7.42 (m)                                                                                | 7.43                                                                                                                    | 7.50–7.20                        | 7.42                                                                                                                  | 7.62–6.98                         |
| Hp             | 7.30                             | 7.31 (m)                                                                                | 7.36                                                                                                                    | 7.50–7.20                        | 7.31                                                                                                                  | 7.62–6.98                         |

**Table S2.**  $^{13}\text{C}$ - and  $^{15}\text{N}$ -NMR in solution and solid state of pyrazole derivatives (chemical shifts  $\delta$  in ppm,  $J$  coupling constants in Hz).

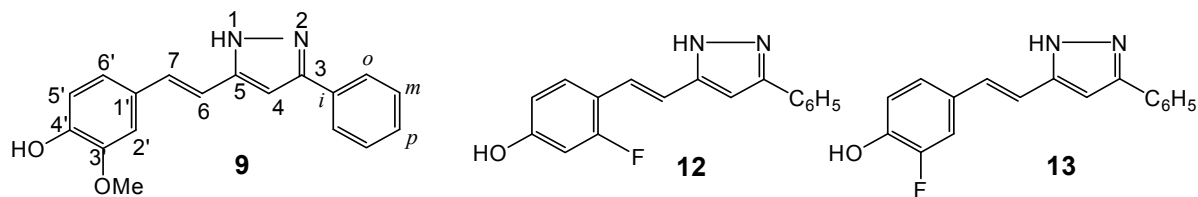

| Nuclei         | 9                                     |                 | 12                                           |                                                  | 13                                                                                                         |                                                                      |                                                  |
|----------------|---------------------------------------|-----------------|----------------------------------------------|--------------------------------------------------|------------------------------------------------------------------------------------------------------------|----------------------------------------------------------------------|--------------------------------------------------|
| Solvent (Temp) | DMSO- <i>d</i> <sub>6</sub> 300 K [6] | CPMAS 300 K [6] | DMSO- <i>d</i> <sub>6</sub> 295 K            | CPMAS 300 K                                      | DMSO- <i>d</i> <sub>6</sub> 295 K                                                                          | HMPA- <i>d</i> <sub>18</sub> 295 K                                   | CPMAS 300 K                                      |
| C3             | 151.0 (major)<br>151.4 (minor)        | 152.6           | 151.0 (minor)<br>150.9 (major)               | 152.2                                            | 150.9 (major)<br>151.1 (minor)                                                                             | 151.0 (major)<br>151.5 (minor)                                       | 151.8                                            |
| C4             | 99.5 (major)<br>100.4 (minor)         | 103.5           | 100.0 (major)<br>99.3 (minor)                | 96.9                                             | 100.0 (major)<br>99.3 (minor)                                                                              | 99.7 (major)<br>99.3 (minor)                                         | 97.9                                             |
| C5             | 142.6 (major)<br>140.3 (minor)        | 144.0           | 142.3 (major)<br>142.9 (minor)               | 144.0                                            | 142.2 (major)<br>142.8 (minor)                                                                             | 143.0 (major)<br>143.1 (minor)                                       | 143.1                                            |
| C6             | 112.7 (major)<br>118.4 (minor)        | 113.5           | 114.9 <sup>a</sup>                           | 117.9                                            | 114.0 (major)<br>119.7 (minor)                                                                             | 114.5 (major)<br>120.2 (minor)                                       | 125.6                                            |
| C7             | 130.1                                 | 129.0           | 122.0 <sup>a</sup>                           | 122.0                                            | 128.1 (major)<br>128.5 (minor)                                                                             | 129.0 (major)<br>129.3 (minor)                                       | 130.4                                            |
| C1'            | 128.1                                 | 129.0           | 122.1 <sup>a</sup>                           | 117.9                                            | 129.0 (major)<br>129.3 (minor)                                                                             | 128.0 (major)<br>129.3 (minor)                                       | 131.6                                            |
| C2'            | 109.5                                 | 112.3           | 160.5<br><sup>1</sup> J <sub>F</sub> = 247.3 | 161.4/158.8<br><sup>1</sup> J <sub>F</sub> ~ 262 | 113.4<br><sup>2</sup> J <sub>F</sub> = 18.6                                                                | 113.4<br><sup>2</sup> J <sub>F</sub> = 18.5                          | 109.1                                            |
| C3'            | 147.9                                 | 148.3           | 102.8<br><sup>2</sup> J <sub>F</sub> = 24.3  | 108.0                                            | 151.2<br><sup>1</sup> J <sub>F</sub> = 240.8                                                               | 152.1<br><sup>1</sup> J <sub>F</sub> = 241.8                         | 156.9/154.6<br><sup>1</sup> J <sub>F</sub> ~ 247 |
| R <sub>3</sub> | 55.6 (major)<br>55.5 (minor)          | 54.0            | ---                                          | ---                                              | ---                                                                                                        | ---                                                                  | ---                                              |
| C4'            | 147.1 (major)<br>146.6 (minor)        | 148.3           | 158.7                                        | 156.2                                            | 145.0 (major)<br><sup>2</sup> J <sub>F</sub> = 12.3<br>144.5 (minor)<br><sup>2</sup> J <sub>F</sub> = 12.7 | 146.7 (major)<br><sup>2</sup> J <sub>F</sub> = 11.8<br>146.3 (minor) | 144.9                                            |
| C5'            | 115.6 (major)<br>115.3 (minor)        | 116.0           | 112.3                                        | 113.6                                            | 117.9 (major)<br>119.7 (minor)                                                                             | 118.0<br><sup>3</sup> J <sub>F</sub> = 3.8                           | 114.7                                            |
| C6'            | 120.2 (major)<br>122.1 (minor)        | 119.5           | 128.2                                        | 128.5                                            | 123.4 (major)<br>123.1 (minor)                                                                             | 122.7 (major)<br>122.4 (minor)                                       | 122.9                                            |
| C <sub>i</sub> | 133.6 (major)<br>132.0 (minor)        | 133.2           | 133.6                                        | 130.2                                            | 133.6 (major)<br>129.0 (minor)                                                                             | 135.2 (major)<br>130.8 (minor)                                       | 132.3                                            |
| C <sub>o</sub> | 125.1 (major)<br>125.0 (minor)        | 126.4           | 125.1                                        | 124.3                                            | 125.1                                                                                                      | 125.4 (major)<br>125.5 (minor)                                       | 126.3                                            |
| C <sub>m</sub> | 128.7                                 | 129.0           | 128.7                                        | 126.5                                            | 128.6 (major)<br>128.8 (minor)                                                                             | 128.5 (major)<br>128.7 (minor)                                       | 128.1                                            |
| C <sub>p</sub> | 127.5                                 | 129.0           | 127.4                                        | 126.5                                            | 127.4 (major)<br>128.5 (minor)                                                                             | 127.1 (major)<br>127.7 (minor)                                       | 128.1                                            |
| N1             | <sup>b</sup>                          | -181.5          | <sup>b</sup>                                 | -177.2                                           | -177.3 (major)<br>-179.7 (minor)                                                                           | -177.0 (major)<br>-179.3 (minor)                                     | -168.5                                           |
| N2             | <sup>b</sup>                          | -105.3          | <sup>b</sup>                                 | -111.9                                           | <sup>b</sup>                                                                                               | <sup>b</sup>                                                         | -120.0                                           |

<sup>a</sup> Broad signal; <sup>b</sup> Not detected.

Table S2. Cont.

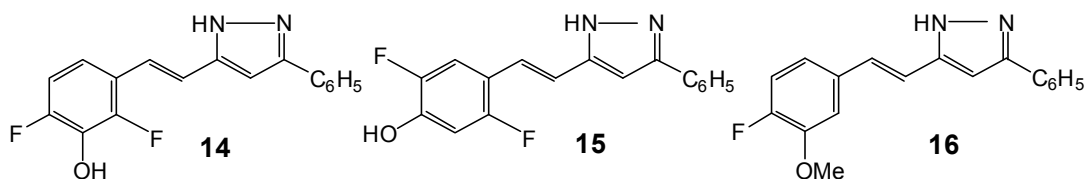

| Nuclei         | 14                |                                                                                   | 15             |                                                                                  |                                                         | 16                                                                                                                                                           |                                      |                                                                                                          |                                                                                                          |                |
|----------------|-------------------|-----------------------------------------------------------------------------------|----------------|----------------------------------------------------------------------------------|---------------------------------------------------------|--------------------------------------------------------------------------------------------------------------------------------------------------------------|--------------------------------------|----------------------------------------------------------------------------------------------------------|----------------------------------------------------------------------------------------------------------|----------------|
|                | Solvent<br>(Temp) | DMSO- <i>d</i> <sub>6</sub><br>295 K                                              | CPMAS<br>300 K | DMSO- <i>d</i> <sub>6</sub><br>295 K                                             | CPMAS<br>300 K                                          | CDCl <sub>3</sub><br>300 K                                                                                                                                   | DMSO- <i>d</i> <sub>6</sub><br>360 K | DMSO- <i>d</i> <sub>6</sub><br>295 K                                                                     | HMPA- <i>d</i> <sub>18</sub><br>295 K                                                                    | CPMAS<br>300 K |
| C3             |                   | 151.0 (major)<br>153.3 (minor)                                                    | 153.7          | 151.0                                                                            | 148.9                                                   | 148.5                                                                                                                                                        | --                                   | 150.9                                                                                                    | 151.0 (major)<br>151.3 (minor)                                                                           | 152.1          |
| C4             |                   | 100.7 (major)<br>99.9 (minor)                                                     | 97.1           | 100.6 <sup>a</sup> (major)<br>99.6 <sup>a</sup> (minor)                          | 98.4                                                    | 100.2<br><sup>1</sup> J <sub>H</sub> = 174.9<br><sup>3</sup> J <sub>H</sub> = 3.4                                                                            | 99.6                                 | 100.3 (major)<br>99.4 (minor)                                                                            | 100.3 (major)<br>99.4 (minor)                                                                            | 102.7          |
| C5             |                   | 141.8 (major)<br>143.0 (minor)                                                    | 142.5          | 143.0 (minor)<br>142.0 (major)                                                   | 143.9                                                   | 147.2                                                                                                                                                        | --                                   | 142.0 (major)<br>142.9 (minor)                                                                           | 142.6 (major)<br>143.2 (minor)                                                                           | 142.1          |
| C6             |                   | 117.8                                                                             | 121.7          | 116.2 (major)<br>120.1 (minor)                                                   | 116.8                                                   | 117.8<br><sup>1</sup> J <sub>H</sub> ~ 158.3                                                                                                                 | 119.0                                | 115.9 (major)<br>119.4 (minor)                                                                           | 116.1<br>122.5                                                                                           | 115.0          |
| C7             |                   | 123.6                                                                             | 123.6          | 120.8 (major)<br>122.0 (minor)                                                   | 124.9/123.7                                             | 129.9<br><sup>5</sup> J <sub>F</sub> = 1.6<br><sup>1</sup> J <sub>H</sub> ~ 155.3                                                                            | 128.2                                | 128.9 (major)<br>128.3 (minor)                                                                           | 128.8 (major)<br>128.0 (minor)                                                                           | 130.5          |
| C1'            |                   | 121.3 (major)<br>120.7 (minor)                                                    | 121.7          | 114.9 (major)<br>115.3 (minor)                                                   | 119.8                                                   | 133.3<br><sup>4</sup> J <sub>F</sub> = 3.8                                                                                                                   | ---                                  | 129.0                                                                                                    | 134.8 (major)                                                                                            | 133.6          |
| C2'            |                   | 150.2<br><sup>1</sup> J <sub>F</sub> = 245.6<br><sup>3</sup> J <sub>F</sub> = 5.8 | 150.1          | 155.7<br><sup>1</sup> J <sub>F</sub> = 244.6                                     | 157.5/154.8 <sup>1+</sup><br><i>J<sub>F</sub></i> ~ 272 | 111.0<br><sup>3</sup> J <sub>F</sub> = 1.8<br><sup>1</sup> J <sub>H</sub> = 157.1                                                                            | 111.8                                | 110.9                                                                                                    | 111.6                                                                                                    | 113.8          |
| C3'            |                   | 134.0<br><sup>2</sup> J <sub>F</sub> = 16.1<br><sup>2</sup> J <sub>F</sub> = 16.1 | 153.1          | 105.0<br><sup>2</sup> J <sub>F</sub> = 26.6                                      | 109.8                                                   | 147.8<br><sup>2</sup> J <sub>F</sub> = 11.2                                                                                                                  | ---                                  | 147.4<br><sup>2</sup> J <sub>F</sub> = 10.9                                                              | 148.1<br><sup>2</sup> J <sub>F</sub> = 10.7                                                              | 148.2          |
| R <sub>3</sub> |                   | ---                                                                               | ---            | ---                                                                              | ---                                                     | 56.2<br><sup>1</sup> J <sub>H</sub> = 144.7                                                                                                                  | 56.1                                 | 56.0                                                                                                     | 56.3                                                                                                     | 56.7           |
| C4'            |                   | 151.7<br><sup>1</sup> J <sub>F</sub> = 240.6                                      | 135.5          | 145.7                                                                            | 148.0                                                   | 152.4<br><sup>1</sup> J <sub>F</sub> = 249.2<br><sup>3</sup> J <sub>H</sub> = 10.7<br><sup>3</sup> J <sub>H</sub> = 8.5<br><sup>2</sup> J <sub>H</sub> = 5.0 | ---                                  | 151.3 (major)<br><sup>1</sup> J <sub>F</sub> = 249<br>151.1 (minor)<br><sup>1</sup> J <sub>F</sub> = 246 | 151.9 (major)<br><sup>1</sup> J <sub>F</sub> = 244<br>151.7 (minor)<br><sup>1</sup> J <sub>F</sub> = 242 | 152.1          |
| C5'            |                   | 111.9<br><sup>2</sup> J <sub>F</sub> = 18.6                                       | 111.2          | 148.1<br><sup>1</sup> J <sub>F</sub> = 236.9                                     | 153.5/150.9 <sup>1</sup><br><i>J<sub>F</sub></i> ~ 269  | 116.2<br><sup>2</sup> J <sub>F</sub> = 18.8 <sup>1</sup><br><i>J<sub>H</sub></i> = 162.6                                                                     | 115.6                                | 115.9 (major)<br><sup>2</sup> J <sub>F</sub> = 18<br>116.0 (minor)<br><sup>2</sup> J <sub>F</sub> = 23   | 116.6 (major)<br><sup>2</sup> J <sub>F</sub> = 22<br>116.5 (minor)<br><sup>2</sup> J <sub>F</sub> = 24   | 114.2          |
| C6'            |                   | 115.9<br><sup>3</sup> J <sub>F</sub> = 8.2<br><sup>3</sup> J <sub>F</sub> = 3.6   | 119.4          | 113.4<br><sup>2</sup> J <sub>F</sub> = 21.1<br><sup>3</sup> J <sub>F</sub> = 5.4 | 110.6                                                   | 119.5<br><sup>3</sup> J <sub>F</sub> = 6.8<br><sup>1</sup> J <sub>H</sub> = 161.6                                                                            | 121.7                                | 119.4 (major)<br>121.5 (minor)                                                                           | 119.2<br><sup>3</sup> J <sub>F</sub> = 6.6                                                               | 118.4          |
| Ci             |                   | 133.5                                                                             | 126.8          | 133.5                                                                            | 129.3                                                   | 131.1                                                                                                                                                        | ---                                  | 133.5 (major)<br>134.1 (minor)                                                                           | 135.1 (major)<br>135.2 (minor)                                                                           | 133.6          |

Table S2. Cont.

| Nuclei | 14     |        |                                | 15     |                                                            |       | 16                               |                                |                |
|--------|--------|--------|--------------------------------|--------|------------------------------------------------------------|-------|----------------------------------|--------------------------------|----------------|
|        |        |        |                                |        | 125.6                                                      |       |                                  |                                |                |
| Co     | 125.1  | 126.8  | 125.1                          | 128.1  | $^1J_H = 158.4$<br>$^3J_H = 7.1$<br>$^3J_H = 7.1$          | 124.8 | 125.1                            | 125.3 (major)<br>125.5 (minor) | 124.3<br>127.2 |
| Cm     | 128.8  | 132.3  | 128.7                          | 128.9  | 128.9<br>$^1J_H = 159.8$<br>$^3J_H = 7.7$                  | 128.0 | 128.7 (major)<br>129.0 (minor)   | 128.6 (major)<br>128.8 (minor) | 128.3          |
| Cp     | 127.6  | 129.0  | 127.5 (major)<br>128.3 (minor) | 130.9  | 128.4<br>$^1J_H = 161.2$<br>$^3J_H = 7.5$<br>$^3J_H = 7.5$ | 127.1 | 127.4 (major)<br>128.1 (minor)   | 127.1 (major)<br>127.7 (minor) | 128.3          |
| N1     | -178.3 | -191.7 | -178.6                         | -152.2 | a                                                          | a     | -177.6 (major)<br>-179.2 (minor) | -176.4                         | -181.1         |
| N2     | a      | -93.9  | a                              | -141.1 | a                                                          | a     | a                                | a                              | -94.7          |

<sup>a</sup> Not detected.

**ORTEP plot (40% Ellipsoid Probability) of 13 and 16 Showing the Labeling of Their Asymmetric Units**

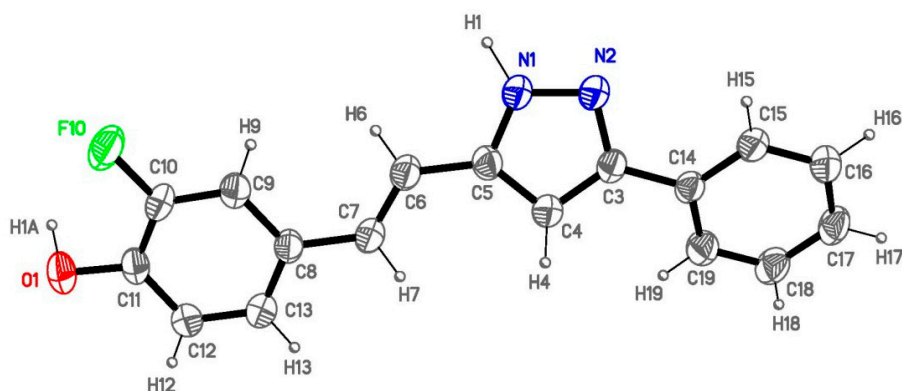

**Figure S1.** (*E*)-5-[ $\beta$ -(3-Fluoro-4-hydroxyphenyl)-ethenyl]-3-phenyl-1*H*-pyrazole (**13**).

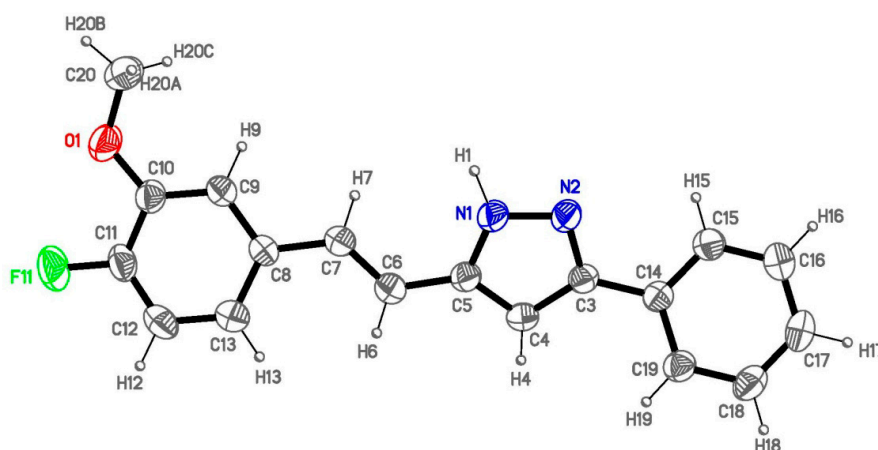

**Figure S2.** (*E*)-5-[ $\beta$ -(4-Fluoro-3-methoxyphenyl)-ethenyl]-3-phenyl-1*H*-pyrazole (**16**).

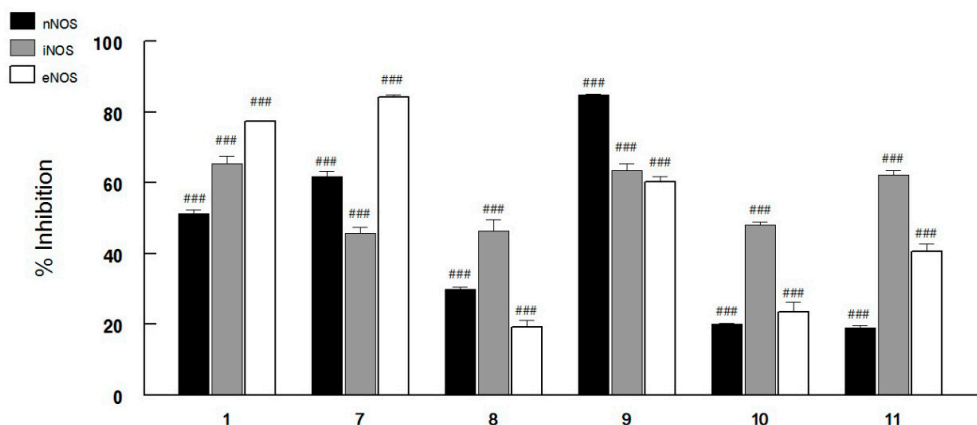

**Figure S3.** Percentage of inhibition of nNOS, iNOS and eNOS activities in the presence of the tested curcuminoid pyrazoles (**1**, **7–11**) compared to control (0% inhibition). Experimental data represent the means  $\pm$  S.E.M. of three independent experiments ( $n = 3$ ), each one performed in triplicate  $### p < 0.001$  vs. control.

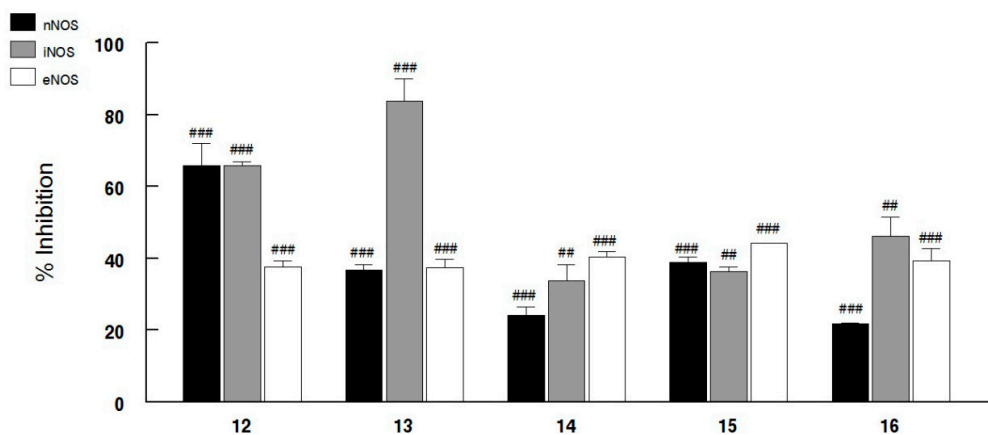

**Figure S4.** Percentage of inhibition of nNOS, iNOS and eNOS activities in the presence of the tested curcuminoid pyrazoles (**12–16**) compared to control (0% inhibition). Experimental data represent the means  $\pm$  S.E.M. of three independent experiments ( $n = 3$ ), each one performed in triplicate  $## p < 0.01$   $### p < 0.001$  vs. control.

**Table S3.** Free Wilson matrix used to obtain the statistical results of Table 5.

| Compound  | F2' | F3' | F4' | F5' | OH-3' | nNOS   | iNOS   | eNOS   |
|-----------|-----|-----|-----|-----|-------|--------|--------|--------|
| <b>1</b>  | 0   | 0   | 0   | 0   | 0     | 2.560  | 3.265  | 3.870  |
| <b>7</b>  | 0   | 0   | 0   | 0   | 0     | 3.085  | 2.280  | 4.205  |
| <b>8</b>  | 0   | 0   | 0   | 0   | 0     | 1.495  | 2.320  | 0.960  |
| <b>9</b>  | 0   | 0   | 0   | 0   | 0     | 4.245  | 3.175  | 3.015  |
| <b>10</b> | 0   | 0   | 0   | 0   | 0     | 1.000  | 2.400  | 1.170  |
| <b>11</b> | 0   | 0   | 0   | 0   | 0     | 0.950  | 3.105  | 2.030  |
| <b>12</b> | 1   | 0   | 0   | 0   | 0     | 65.900 | 65.800 | 37.600 |
| <b>13</b> | 0   | 1   | 0   | 0   | 0     | 36.800 | 83.700 | 37.400 |
| <b>14</b> | 1   | 0   | 1   | 0   | 1     | 24.100 | 33.600 | 40.300 |
| <b>15</b> | 1   | 0   | 0   | 1   | 0     | 38.900 | 36.300 | 44.200 |
| <b>16</b> | 0   | 0   | 1   | 0   | 0     | 21.700 | 46.000 | 39.300 |

$$\text{nNOS} = (65.9 \pm 2.5) \text{F2}' + (36.8 \pm 2.5) \text{F3}' + (21.7 \pm 2.5) \text{F4}' - (27.0 \pm 3.6) \text{F4}' - (63.5 \pm 4.4) \text{OH-3}',$$

$n = 11, R^2 = 0.995;$

$$\text{iNOS} = (65.8 \pm 2.8) \text{F2}' + (83.7 \pm 2.8) \text{F3}' + (46.0 \pm 2.8) \text{F4}' - (29.5 \pm 3.9) \text{F4}' - (78.2 \pm 4.8) \text{OH-3}',$$

$n = 11, R^2 = 0.997;$

$$\text{nNOS} = (37.6 \pm 2.9) \text{F2}' + (37.4 \pm 2.9) \text{F3}' + (39.3 \pm 2.9) \text{F4}' + (6.6 \pm 3.0) \text{F4}' - (36.6 \pm 4.9) \text{OH-3}',$$

$n = 11, R^2 = 0.994.$
